# Supplementary material
Source: PubMed Central journal article supplement (PMC4259925)
Supplement: mmc1.pdf [file mmc1.pdf]

The American Journal of Human Genetics, Volume 95

Supplemental Data

**Mutations Affecting the BHLHA9 DNA-Binding Domain  
Cause Mesoaxial Synostotic Syndactyly  
with Phalangeal Reduction, Malik-Percin Type, MSSD**

Sajid Malik, Ferda E. Percin, Dorothea Bornholdt, Beate Albrecht, Antonio Percesepe,  
Manuela C. Koch, Antonio Landi, Barbara Fritz, Rizwan Khan, Sara Mumtaz, Nurten A.  
Akarsu, and Karl-Heinz Grzeschik

## Supplemental Data

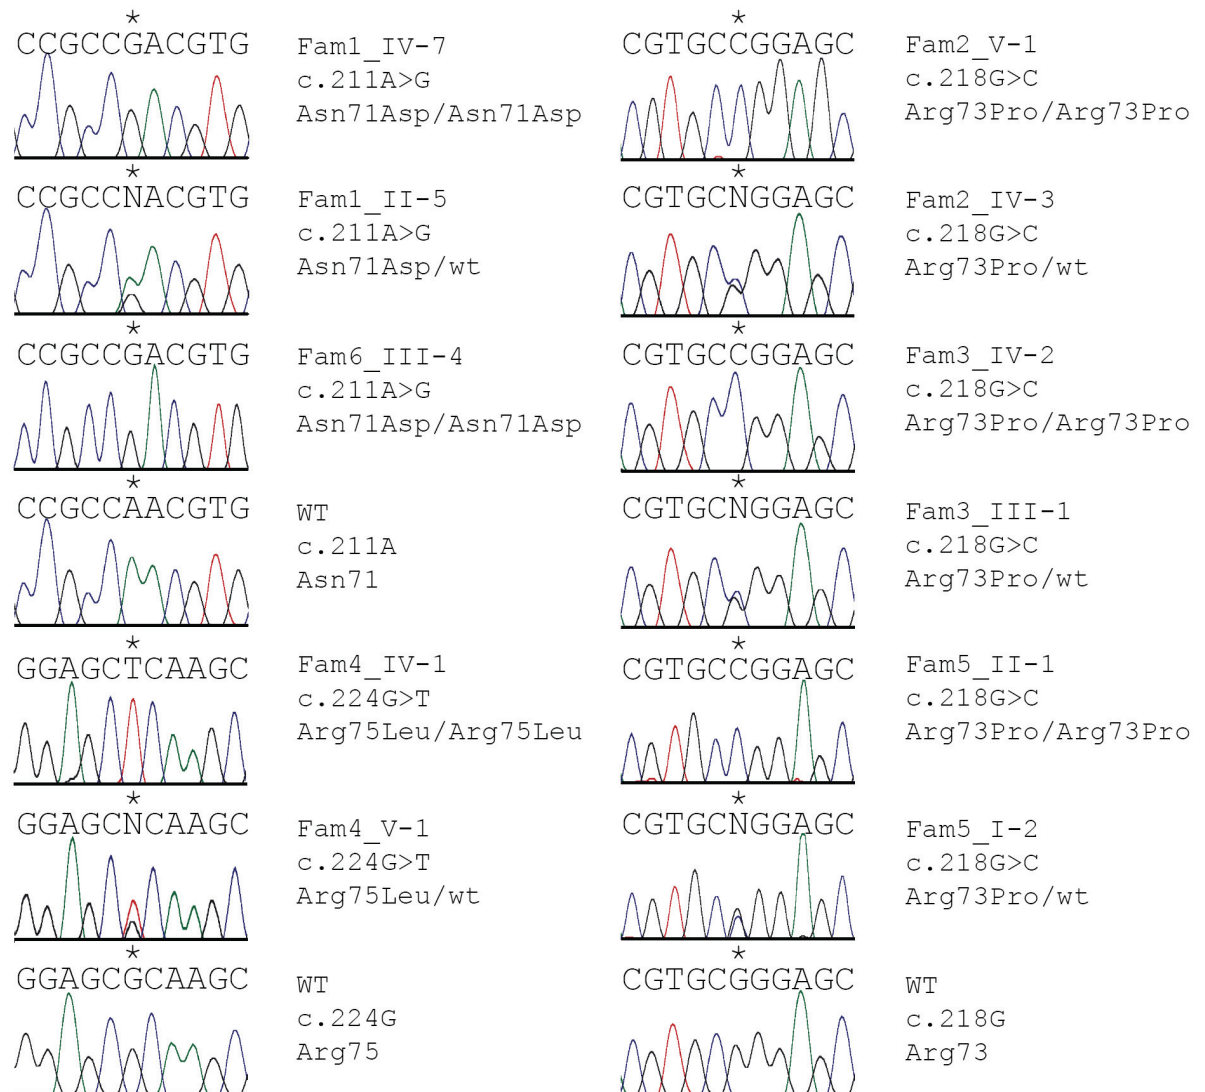

**Figure S1**

### ***BHLHA9* Mutations in MSSD Detected by DNA Sequencing**

DNA sequence electropherograms of wild type (WT) *BHLHA9* and mutations observed in syndactyly type IX individuals or heterozygous parents from 6 unrelated families. The positions of the mutant bases are indicated by asterisks. Phenotypes of the individuals analyzed are listed in Table1.

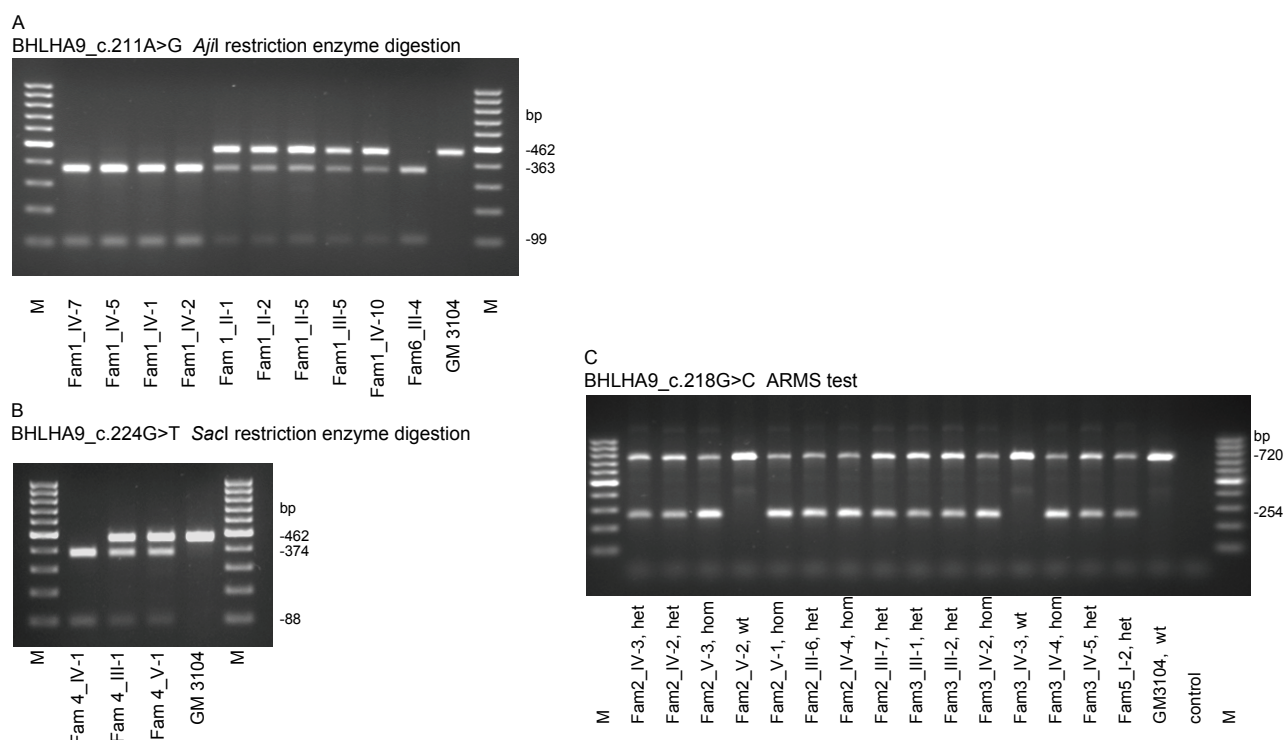

**Figure S2**

***BHLHA9* Mutations in MSSD Detected by Allele Specific Restriction Enzyme Digestion or an ARMS Test**

(A) Electropherogram of *AjiI* restriction enzyme digestion of a PCR fragment (primers BH 2-1for and rev, Table S3) of families 1 and 6 segregating *BHLHA9*\_c.211A>G. In DNA from individuals with the mutation the wild type fragment of 462 bp is cut into fragments of 363 bp and 99 bp.

(B) Electropherogram of *SacI* restriction enzyme digestion of a PCR fragment (primers BH 2-1for and rev, Table S3) of family 4 segregating *BHLHA9*\_c.224G>T. In DNA from individuals with the mutation the wild type fragment of 462 bp is cut into fragments of 374 bp and 88 bp.

(C) Electropherogram of PCR products (254 bp) generated by an amplification-refractory mutation system (ARMS) test (primers BH2for and BHarms 2 rev Mut, Table S3) with DNA of families 2, 3, and 5 segregating *BHLHA9*\_c.218G>C. The products generated from the mutated allele differ in quantity in homozygotes (hom) versus heterozygotes (het). A 720bp PCR product generated in the same reaction with primers BH2for and rev is shown for control. A parallel test (primers BH2for and BHarms1 rev WT) generating a product only with wild type alleles confirmed the result (data not shown).

M = 100 bp size marker. Phenotypes of the individuals analyzed are listed in Table 1. GM3104 = human unaffected control.

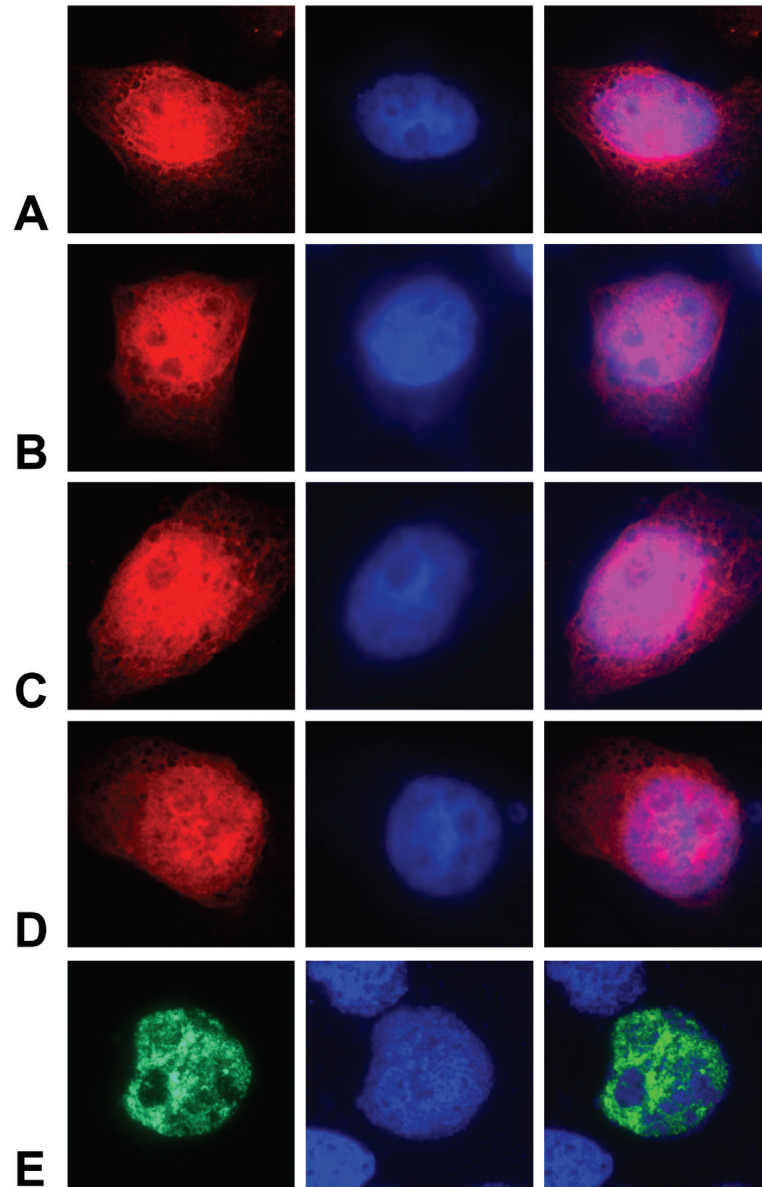

**Figure S3**

**Histochemical Analysis of Cellular Expression of Wild Type and Mutant BHLHA9 and TCF4**

Cos7 cells expressing (A) wild type *HsBHLHA9\_MYC/DDK* or mutant *BHLHA9*, (B) *BH\_N71D*, (C) *BH\_R73P*, (D) *BH\_R75L* in expression vector pCMV6-Entry/C-Myc-DDK, or (E) human *TCF4* in expression vector pcDNA6.2/N-YFP-DEST. First column: The MYC-tag of BHLHA9 was detected by immuno-fluorescence with anti-c-myc mouse IgG monoclonal antibody and Alexa Fluor 594 goat anti-mouse IgG (H+L). Expressed TCF4 was detected by fluorescence of the YFP tag. Second column: Nuclei are stained with DAPI. Third column: Overlay images. In contrast to TCF4 which is detected only in the nucleus, the BHLHA9 protein is localized both in the cytoplasm and the nucleus. With a mass of 24,142 Da, BHLHA9 may enter the nucleus by passive transport.

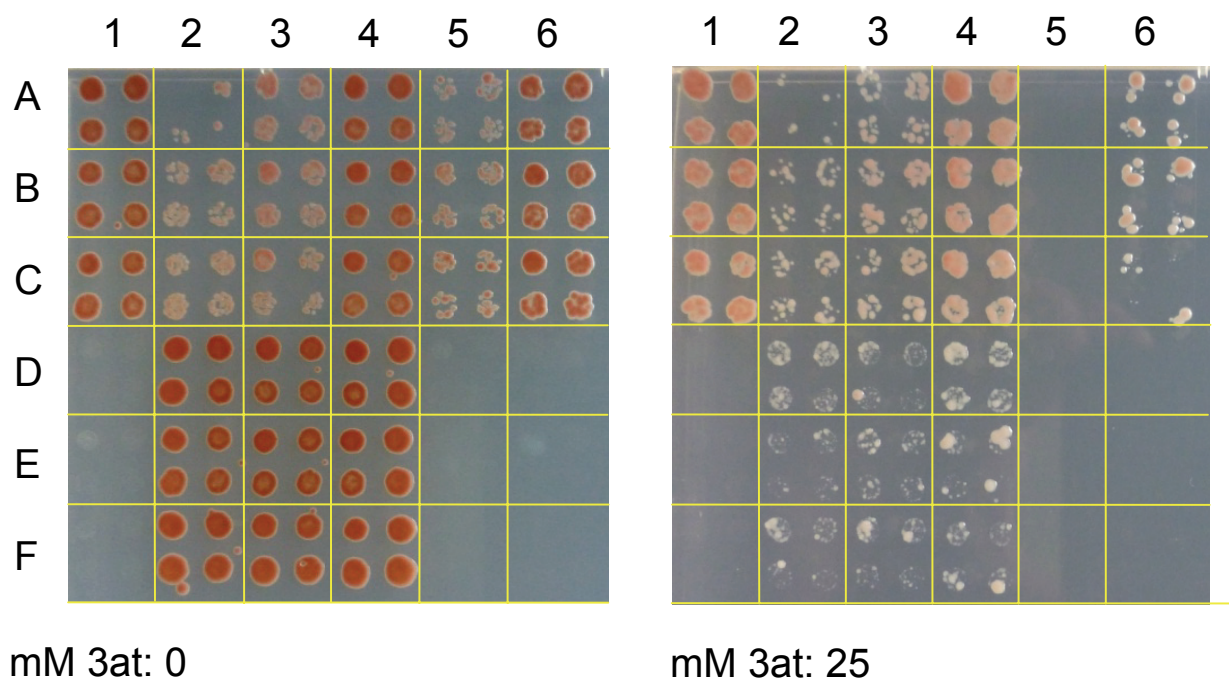

**Figure S4**

#### **Pairwise Y2H Analysis of BHLHA9 with BHLH Domain Containing Bait Proteins**

(A), (B), (C) Triplicate analyses of Y2H analyses at 0 mM 3-Amino-1,2,4-triazole (3at) and 25 mM 3at of *BHLHA9wt* as prey in vector pGADT7gw with baits: 1: *BHLHA9wt*, 2: *TCF4*, 3: *TCF3*, 4: *TCF12*, 5: *TWIST1*, 6: *HAND2* in vector pGBT9gw.

(D), (E), (F) Triplicate autoactivation controls with baits 1 – 6 in pGBT9gw and empty pGADT7gw. *BHLHA9wt*–homodimers show reproducible interaction and no autoactivation, whereas *TCF3*, *TCF4*, and *TCF12* show strong autoactivation which can mostly be eliminated by addition of 25 mM 3at. *TWIST1* interacts only weakly with *BHLHA9wt* (at 0 mM 3at), whereas *HAND2* shows strong reproducible interaction (10-25 mM 3at) and no autoactivation.

#### **Molecular Constructs for Y2H Analysis**

The translated segment of *Mus musculus* (Mm) *Bhlha9* cDNA [NM\_177182.4] was isolated from the potentially complete cDNA clone [BC048728/IRAVp968C09144D, Source Bioscience] and cloned into vector pGBT9\_DNA\_BD [Clontech; Genbank: U07646] to generate pGBT9\_MmBhlha9. The translated segment of wild type human *BHLHA9* cDNA was inserted by TOPO cloning into pCR8/GW/TOPO and shuttled using gateway (gw) technology [Invitrogen] into pGBT9gw or pGADT7gw (kindly provided by F. Schwarz, DKFZ, Heidelberg) to generate pGBT9\_HsBHLHA9/wt and pGADT7\_HsBHLHA9/wt. The translated segments of human *TCF3*,

*TCF4*, and *TCF12* were isolated by PCR (Table S3) from the potentially complete cDNA clones [BC110580.1/IRCMp5012E0634D, BC125084.1/IRCMp5012C034D, and BC050556/IRATp970B1176D, Source Bioscience, Nottingham, UK] and inserted by TOPO cloning into pCR8/GW/TOPO [Invitrogen]. The inserts of the resulting constructs were shuttled using Gateway (gw) technology [Invitrogen] into pGBT9gw to generate pGBT9\_HsTCF3, pGBT9\_HsTCF4, and pGBT9\_HsTCF12.

Plasmids pGBT9\_HsTWIST1 and pGBT9\_HsHAND2, harbouring the translated segments of human *TWIST1* and *HAND2* cDNAs were obtained from Source Bioscience.

### **Yeast-2-Hybrid (Y2H) Analysis Methods**

Two mouse total embryonic cDNA libraries (d11 and d17,  $3.8 \times 10^6$  and  $5.6 \times 10^6$  clones, respectively) in vectors pACT2 and pGADT7 were screened at the German Cancer Research Center, Heidelberg, by Y2H analyses for clones encoding proteins interacting with mouse BHLHA9, expressed by vector pGBT9\_MmBhlha9. Interaction was detected using appropriate *S. cerevisiae* yeast strains. cDNA library inserts of positive clones were retrieved by PCR, sequenced from the 5'-end, and identified by BLAST analysis. Reliable interactions were defined considering stringency (1mM 3 Amino-1,2,4 triazol, 3at), number of clones analyzed, signal intensity, and the frequency of occurrence together with the BHLHA9 bait in comparison with the frequency of occurrence with other baits in previous screens (German Cancer Research Center, Heidelberg). Interactions detected by library screening were confirmed by one-to-one Y2H analysis at 0 mM 3at and 25 mM 3at of *HsBHLHA9* in vector pGADT7gw as prey with human *TCF3*, *TCF4*, and *TCF12* in pGBT9gw as baits (German Cancer Research Center, Heidelberg). Likewise, interactions of BHLHA9 with itself or with human TWIST1 and HAND2 basic helix loop helix proteins were analyzed by one-to-one Y2H analysis. Each of these analyses was performed in triplicate.

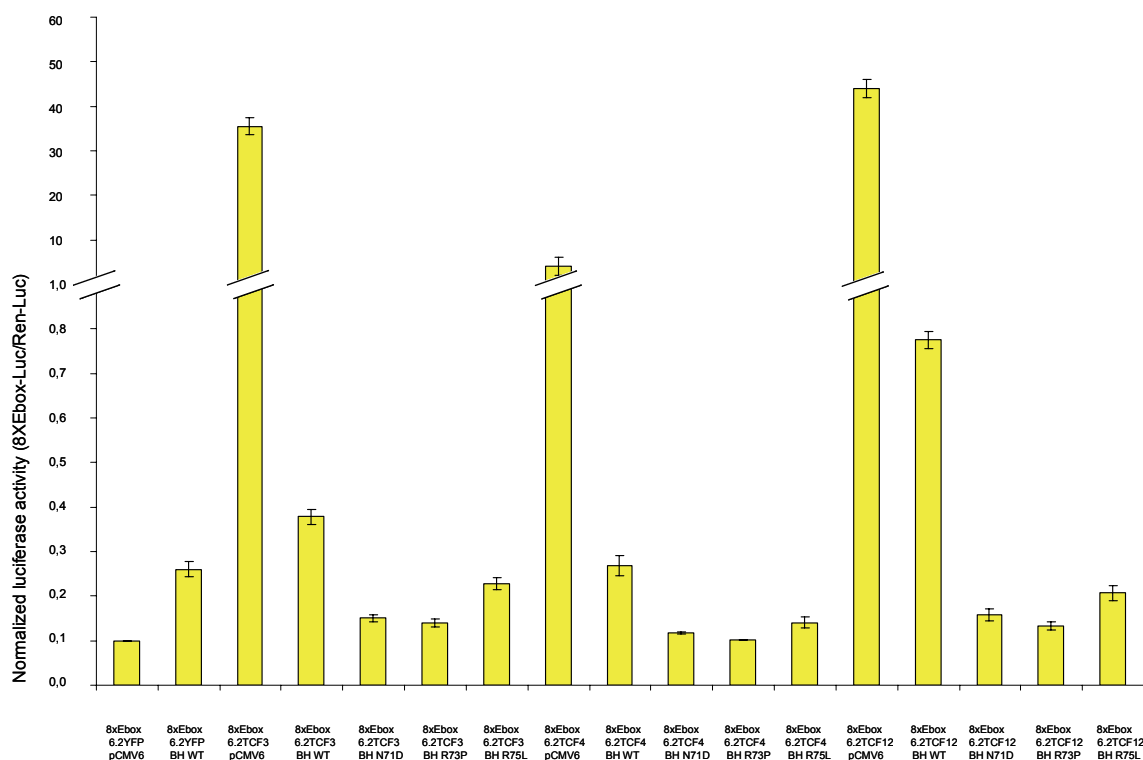

**Figure S5**

### Luciferase Assays in U2OS Cells Demonstrate Regulatory Activity of Co-expressed BHLHA9 and TCFs

Transient cotransfection into U2OS cells of a construct coding for human wild-type (BH\_WT) or mutant BHLHA9 (BH\_N71D, BH\_R73P, BH\_R75L) in expression vector pCMV6-Entry/C-Myc\_DDK (pCMV6), with human *TCF3* (TCF3), human *TCF4* (TCF4), human *TCF12* (TCF12) in expression vectors pcDNA6.2/N-YFP-DEST (6.2YFP), and a pGL3-derived luciferase reporter gene under transcriptional control of the mouse *fos*-promoter with an enhancer element encompassing eight E-box sequences (8xEbox). Transient expression of BH\_WT alone has a small effect on luciferase expression which, however, is more pronounced than in Cos7 cells. The TCFs individually act as strong activators. For *TCF3* and *TCF4* cotransfection with *BHLHA9* reduces reporter activity highly. The luciferase expression in the combination BH\_WT with TCF12 is about double as high as with the other two TCFs. Replacing expression of BH\_WT with any of the three mutant proteins detected in affected individuals abolishes almost completely reporter gene activation in combination with TCF3, TCF4, and TCF12.

Transfection efficiency is normalized to cotransfected *Renilla* luciferase. The values obtained in transfection experiments with 8xEbox and the empty expression vectors (6.2YFP and pCMV6) are set at 0.1, the other values are adapted accordingly. The results shown for TCF3 and TCF12 are derived from three independent experimental series, the results for TCF4 from one series, each made up of three parallel transfection experiments. Normalized luciferase activity (8xEbox-Luc/Ren-Luc) data are represented as mean  $\pm$  SD.

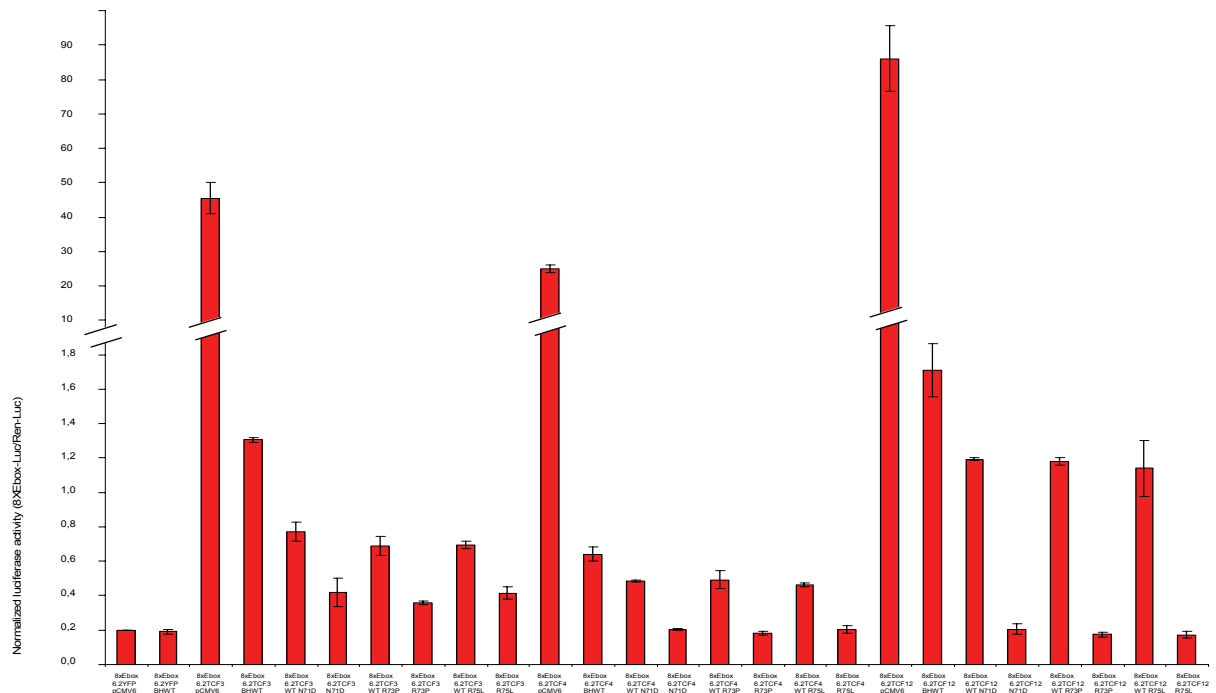

**Figure S6**

### Luciferase Assays Demonstrate a Quantitative Effect of Mutant BHLHA9

Transient cotransfection into Cos7 cells of constructs coding for human TCF3 (6.2TCF3), TCF4 (6.2 TCF4), and TCF12 (6.2TCF12) in expression vector pcDNA6.2/N-YFP-DEST (6.2YFP) with wild-type *BHLHA9* alone (BHWT), mutant *BHLHA9* alone (N71D, R73P, R75L) or combined in equal amounts (WT\_N71D, WT\_R73P, WT\_R75L), in expression vector pCMV6-Entry/C-Myc\_DDK (pCMV6), and a pGL3-derived luciferase reporter gene under transcriptional control of the mouse *fos*-promoter with an enhancer element encompassing eight E-box sequences (8xEbox). Transient expression of BHLHA9\_WT alone has no effect on luciferase expression. The TCFs individually act as strong activators. Cotransfection with wild-type *BHLHA9* reduces luciferase activity considerably. A 1: 1 mixture of wt and mutant *BHLHA9* in combination with *TCF3*, *TCF4*, and *TCF12* reduces the expression rate of the reporter by approximately one third, leaving a residual activity higher than the combination with mutant *BHLHA9* alone. This effect was particularly pronounced for *TCF12*.

Transfection efficiency is normalized to cotransfected Renilla luciferase. The values obtained in transfection experiments with 8xEbox and the empty expression vectors (6.2YFP and pCMV6) are set at 0.2, the other values are adapted accordingly. The results shown are representative of four independent experimental series, each with triplicate parallel transfection experiments. Normalized luciferase activity (8xEbox-Luc/Ren-Luc) data are represented as mean  $\pm$  SD.

**Table S1: Pair-wise LOD Scores Between MSSD Syndactyly Phenotype in Family 3 and Microsatellite Markers on Chromosome 17p13.3**

| Marker          | Map position         |                      |                       | Family 3 ( $\theta$ ) |       |       |       |       |       | Families 1—3 ( $\theta$ ) |        |        |       |       |
|-----------------|----------------------|----------------------|-----------------------|-----------------------|-------|-------|-------|-------|-------|---------------------------|--------|--------|-------|-------|
|                 | Genetic <sup>a</sup> | Genetic <sup>b</sup> | Physical <sup>c</sup> | 0.00                  | 0.01  | 0.05  | 0.10  | 0.20  | 0.30  | 0.00                      | 0.01   | 0.05   | 0.10  | 0.20  |
| <b>D17S849</b>  | 0.63                 | 4.52                 | 432,537               | 0.693                 | 0.671 | 0.586 | 0.484 | 0.301 | 0.157 | 4.104                     | 4.000  | 3.559  | 3.003 | 1.969 |
| <b>D17S1308</b> | 0.63                 | 4.52                 | 622,950               | 0.546                 | 0.528 | 0.459 | 0.377 | 0.231 | 0.120 | 3.119                     | 3.020  | 2.661  | 2.209 | 1.378 |
| <b>D17S926</b>  | 0.63                 | 4.52                 | 630,233               | 0.000                 | 0.000 | 0.000 | 0.000 | 0.000 | 0.000 | 4.915                     | 4.791  | 4.390  | 3.834 | 2.752 |
| <b>D17S695</b>  | 3.67                 | -                    | 746,134               | 0.000                 | 0.000 | 0.000 | 0.000 | 0.000 | 0.000 | 4.968                     | 4.858  | 4.429  | 3.882 | 2.782 |
| <b>D17S596</b>  | 3.96                 | 6.58                 | 1,009,505             | 0.000                 | 0.000 | 0.000 | 0.000 | 0.000 | 0.000 | 1.646                     | 1.623  | 1.514  | 1.354 | 0.994 |
| <b>D17S1529</b> | 3.92                 | 6.58                 | 1,049,360             | 0.000                 | 0.000 | 0.000 | 0.000 | 0.000 | 0.000 | 0.000                     | 0.000  | 0.000  | 0.000 | 0.000 |
| <b>D17S1533</b> | 3.99                 | -                    | 1,540,534             | 0.786                 | 0.762 | 0.669 | 0.555 | 0.349 | 0.184 | 5.153                     | 5.026  | 4.535  | 3.911 | 2.692 |
| D17S831         | 6.60                 | -                    | 1,910,400             | 0.000                 | 0.000 | 0.000 | 0.000 | 0.000 | 0.000 | 1.016                     | 1.305  | 1.538  | 1.446 | 1.023 |
| D17S654         | 6.60                 | -                    | 1,910,574             | 0.000                 | 0.000 | 0.000 | 0.000 | 0.000 | 0.000 | -0.960                    | -0.570 | -0.130 | 0.020 | 0.090 |
| D17S1528        | 6.60                 | 9.44                 | 2,024,777             | 0.000                 | 0.000 | 0.000 | 0.000 | 0.000 | 0.000 | 2.659                     | 3.331  | 3.518  | 3.258 | 2.415 |
| D17S1583        | 7.19                 | -                    | 2,704,868             | 0.000                 | 0.000 | 0.000 | 0.000 | 0.000 | 0.000 | 1.922                     | 1.898  | 1.773  | 1.578 | 1.141 |

The markers depicted in bold-face are included in the disease interval. The LOD scores yielded by combining Family 1 and 2, reported earlier (Malik et al. 2005), are also provided (Families 1-3).

<sup>a</sup> Sex-averaged Kosambi map distance (cM) from the Marshfield map (Broman et al. 1998)

<sup>b</sup> Sex-averaged Kosambi map distance (cM) from the Rutgers map (Kong et al. 2004)

<sup>c</sup> Sequence-based physical map distance according to the Human Genome Browser (UCSC Santa Cruz; Feb. 2009; GRCh37/hg19 Assembly)

## References Table S1

- Broman, K.W., Murray, J.C., Sheffield, V.C., White, R.L., Weber, J.L. (1998). Comprehensive human genetic maps: individual and sex-specific variation in recombination. *Am. J. Hum. Genet.* 63, 861-869.
- Kong, X., Murphy, K., Raj, T., He, C., White, P.S., Matisse, T.C. (2004). A combined linkage-physical map of the human genome. *Am. J. Hum. Genet.* 75, 1143-1148.
- Malik, S., Percin, F.E., Ahmad, W., Percin, S., Akarsu, N.A., Koch, M.C., Grzeschik, K.-H. (2005). Autosomal recessive mesoaxial synostotic syndactyly with phalangeal reduction maps to chromosome 17p13.3. *Am. J. Med. Genet.* 134, 404-408.

**Table S2: SNP Genotypes in a 10.7 kb Segment of Chromosome 17p13.3 Encasing BHLHA9**

| SNP             | Alleles | Fam1_IV-7<br>Pakistan | Fam6_III-4<br>Pakistan | Fam2_V-1<br>Turkey | Fam3_IV-2<br>Turkey | Fam5_II-1<br>Pakistan |
|-----------------|---------|-----------------------|------------------------|--------------------|---------------------|-----------------------|
| rs6502542       | C,T     | C/C                   | C/C                    | T/T                | T/T                 | T/T                   |
| rs7216365       | A,C     | A/A                   | A/A                    | A/A                | A/A                 | A/A                   |
| rs57016694      | A,G     | A/A                   | A/A                    | A/A                | A/A                 | A/A                   |
| rs7220578       | A,G     | G/G                   | G/G                    | A/A                | A/A                 | A/A                   |
| rs7218715       | C,T     | T/T                   | T/T                    | T/T                | T/T                 | T/T                   |
| rs6502668       | A,C     | A/A                   | A/A                    | C/C                | C/C                 | C/C                   |
| rs7224856       | A,C     | A/A                   | A/A                    | C/C                | C/C                 | C/C                   |
| rs111986848     | C,G     | C/C                   | C/C                    | C/C                | C/C                 | n.d.                  |
| rs8079493       | T,C     | T/T                   | T/T                    | C/C                | C/C                 | n.d.                  |
| rs190953401     | T,C     | C/C                   | C/C                    | C/C                | C/C                 | n.d.                  |
| rs28754558      | A,G     | A/A                   | A/A                    | A/A                | A/A                 | n.d.                  |
| rs73283201      | C,G     | G/G                   | G/G                    | G/G                | G/G                 | n.d.                  |
| rs112091126     | C,T     | T/T                   | T/T                    | T/T                | T/T                 | n.d.                  |
| rs60062553      | A,G     | G/G                   | G/G                    | G/G                | G/G                 | n.d.                  |
| rs5818793       | -,G     | G/G                   | G/G                    | G/G                | G/G                 | n.d.                  |
| rs73975685      | A,T     | T/T                   | T/T                    | T/T                | T/T                 | n.d.                  |
| rs2063188       | A,G     | G/G                   | G/G                    | G/G                | G/G                 | G/G                   |
| BHLHA9 c.211A>G | A,G     | G/G                   | G/G                    | A/A                | A/A                 | A/A                   |
| BHLHA9 c.218G>C | C,G     | G/G                   | G/G                    | C/C                | C/C                 | C/C                   |
| rs3951819       | A,G     | G/G                   | G/G                    | G/G                | G/G                 | G/G                   |
| rs8071123       | G,T     | G/G                   | G/G                    | G/G                | G/G                 | n.d.                  |
| rs73975687      | A,G     | G/G                   | G/G                    | G/G                | G/G                 | n.d.                  |
| rs77839307      | A,C     | C/C                   | C/C                    | C/C                | C/C                 | n.d.                  |
| rs73975688      | C,G     | C/C                   | C/C                    | C/C                | C/C                 | n.d.                  |
| rs112560750     | C,T     | C/C                   | C/C                    | C/C                | C/C                 | n.d.                  |
| rs59168600      | C,G     | G/G                   | G/G                    | G/G                | G/G                 | n.d.                  |
| rs111751562     | A,C     | A/A                   | A/A                    | A/A                | A/A                 | A/A                   |
| rs6502732       | A,G     | A/A                   | A/A                    | A/A                | A/A                 | A/A                   |
| rs114947760     | G,T     | T/T                   | T/T                    | T/T                | T/T                 | T/T                   |
| rs73285306      | G,T     | T/T                   | T/T                    | T/T                | T/T                 | n.d.                  |
| rs58541517      | A,G     | G/G                   | G/G                    | G/G                | G/G                 | n.d.                  |
| rs111556356     | C,T     | C/C                   | C/C                    | C/C                | C/C                 | n.d.                  |
| rs112921237     | A,G     | A/A                   | A/A                    | A/A                | A/A                 | n.d.                  |
| rs113058253     | A,G     | G/G                   | G/G                    | G/G                | G/G                 | n.d.                  |
| rs201047604     | -,AAAG  | -/-                   | -/-                    | -/-                | -/-                 | n.d.                  |
| rs112648227     | C,T     | C/C                   | C/C                    | C/C                | C/C                 | C/C                   |
| rs1472180       | A,G     | A/A                   | A/A                    | A/A                | A/A                 | A/A                   |
| rs73975691      | A,G     | A/A                   | A/A                    | A/A                | A/A                 | A/A                   |
| rs78022295      | G,T     | G/G                   | G/G                    | G/G                | G/G                 | n.d.                  |
| rs115288747     | A,G     | G/G                   | G/G                    | G/G                | G/G                 | n.d.                  |
| rs199551922     | -,GA    | -/-                   | -/-                    | -/-                | -/-                 | n.d.                  |
| rs10577031      | -,AA    | -/-                   | -/-                    | -/-                | -/-                 | n.d.                  |
| rs201932744     | -,GTGA  | GTGA/GTGA             | GTGA/GTGA              | GTGA/GTGA          | GTGA/GTGA           | n.d.                  |
| rs202010921     | -,T     | -/-                   | -/-                    | -/-                | -/-                 | n.d.                  |
| rs10577032      | -,GT    | -/-                   | -/-                    | -/-                | -/-                 | n.d.                  |
| rs62090185      | C,T     | C/C                   | C/C                    | C/C                | C/C                 | T/T                   |
| rs62090186      | C,T     | C/C                   | C/C                    | C/C                | C/C                 | T/T                   |

SNP denominations are from dbSNP; (-) indicates a deletion; n.d. = alleles not analyzed because of restricted availability of DNA. Phenotypes of the individuals analyzed are listed in Table 1.

**Table S3: Primers and PCR Details**

| Primer               | Sequence (5'-3')                    | Length<br>[bp] | % GC | Fragment<br>length [bp]                                                       | PCR<br>conditions | Cycles | Application                |
|----------------------|-------------------------------------|----------------|------|-------------------------------------------------------------------------------|-------------------|--------|----------------------------|
| BH 2-1for            | CAT AAA GCC CAG CTG GAA GG          | 20             | 55   | 462                                                                           | Beads<br>57°C     | 34     | Mutation detection         |
| BH 2-1rev            | GAT CTT GGA GAG CCT CTT GC          | 20             | 55   |                                                                               |                   |        |                            |
| BH 1for              | GAG GGA GAT GGA TGG ACG GGA         | 21             | 62   | 970                                                                           | Ampli Taq<br>60°C | 33     | Mutation detection         |
| BH 1rev              | GCA GTC CCG GGT TTT ATA GTC         | 21             | 52   |                                                                               |                   |        |                            |
| BH 2for              | GGG AAG GCC ATG CTG CGG G           | 19             | 74   | 720                                                                           | Ampli Taq<br>63°C | 30     | Cloning                    |
| BH 2rev              | CGG TCA GGA GCG CGG ATG G           | 19             | 74   |                                                                               |                   |        |                            |
| BHarms1 rev<br>(WT)  | TTGTAGTCTAGGATGCGCTTGCGCTCTC        | 28             | 57   | 254 with<br>BH2for                                                            | Ampli Taq<br>65°C | 33     | ARMS Test                  |
| BHarms2 rev<br>(Mut) | TTGTAGTCTAGGATGCGCTTGCGCTCTG        | 28             | 57   |                                                                               |                   |        |                            |
| TCF3 for             | AGA ATG AAC CAG CCG CAG AG          | 20             | 55   | 1995                                                                          | Beads<br>56°C     | 19     | Cloning                    |
| TCF3 rev             | ACG GAG GCA TAC CTT TCA CA          | 20             | 50   |                                                                               |                   |        |                            |
| TCF3-1for            | GGT CTT CCA TCC TCG GTG TA          | 20             | 55   | 2037                                                                          | Beads<br>56°C     | 19     | Sequencing                 |
| TCF3-2for            | GCT GGC CTC AGG TTT CAC             | 18             | 61   |                                                                               |                   |        | Sequencing                 |
| TCF4 for             | GCT AAA ATG CAT CAC CAA CAG         | 21             | 43   |                                                                               |                   |        | Cloning                    |
| TCF4 rev             | GCA ACT TGG ACC CTT TTA CAT C       | 22             | 45   |                                                                               |                   |        | Sequencing                 |
| TCF4-1for            | TCC TTG GAG GTG ACA TGG AT          | 20             | 50   | 2142                                                                          | Beads<br>56°C     | 19     | Sequencing                 |
| TCF4-2for            | CAT CTC TCT CAG CAG GCA CA          | 20             | 55   |                                                                               |                   |        | Sequencing                 |
| TCF12 for            | AAG ATG AAT CCC CAG CAA CA          | 20             | 45   |                                                                               |                   |        | Cloning                    |
| TCF12 rev            | TCT GGA ACT GGC TGA TGT TTA         | 21             | 43   |                                                                               |                   |        | Sequencing                 |
| TCF12-1for           | GTC GAT TAG GAG CCC ATG AA          | 20             | 50   |                                                                               |                   |        | Sequencing                 |
| TCF12-2for           | TCA CAC ACT CCT CCC ATC AA          | 20             | 50   |                                                                               |                   |        | Sequencing                 |
| TCF12-3for           | AGG TGG CTT GCA AAG TCA GT          | 20             | 50   |                                                                               |                   |        | Sequencing                 |
| VP1.5 for            | GGA CTT TCC AAA ATG TCG             | 18             | 44   |                                                                               |                   |        | Vector primer for pCMV6    |
| XL39 rev             | ATT AGG ACA AGG CTG GTG GG          | 20             | 55   | Vector primer for pCMV6                                                       | Sequencing        |        |                            |
| BH Sgfl for          | gaggcgatcgccATGCTGCGGGGCGCGCCAGGACT | 35             | 74   | Cloning of <i>BHLHA9</i> Mut in pCMV6                                         |                   |        | Cloning                    |
| BH MluI rev          | gcgacggtGGAGCGCGGATGGCCCATCCCGGG    | 33             | 79   |                                                                               |                   |        |                            |
| V5 rev               | ACC GAG GAG AGG GTT AGG GAT         | 21             | 57   | Vector primer for pcDNA 3.2/V5-DEST<br>Vector primer for pcDNA 6.2/N-YFP-DEST |                   |        | Sequencing                 |
| TK polyA rev         | CTT CCG TGT TTC AGT TAG C           | 19             | 47   |                                                                               |                   |        | Sequencing                 |
| RV3 for              | CTA GCA AAA TAG GCT GTC CC          | 20             | 50   | Vector primer for pGL3                                                        |                   |        | Sequencing                 |
| GL2 rev              | CTT TAT GTT TTT GGC GTC TTC CA      | 23             | 39   |                                                                               |                   |        |                            |
| pGBT9gw 1for         | TCA TCG GAA GAG AGT AG              | 17             | 47   | Vector primer for pGBT9gw                                                     |                   |        | Sequencing                 |
| pGADT7g for          | TTC GAT GAT GAA GAT ACC CCA         | 21             | 43   | Vector primer for pGADT7g                                                     |                   |        | Sequencing                 |
| 8xEbox for           | TGC CAG AAC ATT TCT CTA TCG         | 21             | 43   | 291                                                                           | Beads<br>56°C     | 18     | Re-cloning into<br>pGL4.23 |
| 8xEbox rev           | ATA GAA GCG CTG TGA ATG GA          | 20             | 45   |                                                                               |                   |        |                            |

**Table S4: Consequences of Mutations in *BHLHA9* (Computational Analyses)**

| Name/ Exon   | Mutation | Codon change | Change in amino acid | Type of change    | SIFT Human Protein result:                                                 | PolyPhen-2 result:                                                                                              | Mutation Taster result: | MutPred result:                           | MutPred features of mutation:                                                                                                                                                                         |
|--------------|----------|--------------|----------------------|-------------------|----------------------------------------------------------------------------|-----------------------------------------------------------------------------------------------------------------|-------------------------|-------------------------------------------|-------------------------------------------------------------------------------------------------------------------------------------------------------------------------------------------------------|
| Mut1, exon 1 | c.211A>G | AAC GAC      | > N71D               | Missense mutation | DAMAGING - Low confidence predictions with Median conservation above 3.25  | This mutation is predicted to be PROBABLY DAMAGING with a score of 0.998 (sensitivity: 0.27; specificity: 0.99) | disease causing         | Probability of deleterious mutation 0.766 | Gain of ubiquitination at K76 (P = 0.0314)<br>Loss of methylation at R67 (P = 0.0831)<br>Gain of helix (P = 0.132)<br>Loss of loop (P = 0.2897)<br>Loss of stability (P = 0.3857)                     |
| Mut2, exon 1 | c.218G>C | CGG CCG      | > R73P               | Missense mutation | DAMAGING - Low confidence predictions with Median conservation above 3.25  | This mutation is predicted to be PROBABLY DAMAGING with a score of 0.999 (sensitivity: 0.14; specificity: 0.99) | disease causing         | Probability of deleterious mutation 0.831 | Gain of ubiquitination at K76 (P = 0.0303)<br>Loss of helix (P = 0.0558)<br>Gain of glycosylation at R73 (P = 0.0591)<br>Loss of MoRF binding (P = 0.0921)<br>Gain of methylation at K76 (P = 0.1203) |
| Mut3, exon 1 | c.224G>T | CGC CTC      | > R75L               | Missense mutation | TOLERATED - Low confidence predictions with Median conservation above 3.25 | This mutation is predicted to be PROBABLY DAMAGING with a score of 0.999 (sensitivity: 0.14; specificity: 0.99) | disease causing         | Probability of deleterious mutation 0.890 | Loss of disorder (P = 0.1204)<br>Loss of helix (P = 0.1299)<br>Loss of methylation at K76 (P = 0.1387)<br>Loss of ubiquitination at K76 (P = 0.1828)<br>Gain of loop (P = 0.2045)                     |

In silico analyses were carried out in order to predict the pathogenicity of identified mutations. The following tools were utilized: SIFT ([http://sift.jcvi.org/www/SIFT\\_enst\\_submit.html](http://sift.jcvi.org/www/SIFT_enst_submit.html)), PolyPhen-2 (<http://genetics.bwh.harvard.edu/pph2/>), MutationTaster (<http://www.mutationtaster.org/>), MutPred (<http://mutpred.mutdb.org/>). Conclusions: All tools utilized predict severe pathogenic consequences of all three mutations.

**Table S5: TCFs Interacting with a BHLHA9 Bait in Y2H Screens of d11 and d17 Mouse Embryo Libraries**

| Bait     | Prey gene symbol | Number of times this prey has been isolated | Number of times the fragment starts in the 5' UTR | Number of times the fragment starts in the coding sequence | Number of times the fragment starts in the 3' UTR | Prey promiscuity | Description             | Link to genes         | Number of different screens in which this pair has been found | Number of different cDNA libraries in which this pair has been found |
|----------|------------------|---------------------------------------------|---------------------------------------------------|------------------------------------------------------------|---------------------------------------------------|------------------|-------------------------|-----------------------|---------------------------------------------------------------|----------------------------------------------------------------------|
| BC048728 | Tcf4             | 43                                          | 1                                                 | 41                                                         | 1                                                 | 1                | transcription factor 4  | <a href="#">21413</a> | 2                                                             | 2                                                                    |
| BC048728 | Tcf3             | 12                                          | 0                                                 | 12                                                         | 0                                                 | 1                | transcription factor 3  | <a href="#">21423</a> | 2                                                             | 2                                                                    |
| BC048728 | Tcf12            | 1                                           | 0                                                 | 1                                                          | 0                                                 | 1                | transcription factor 12 | <a href="#">21406</a> | 1                                                             | 1                                                                    |
